# Supplementary figures and images for: Cyano-activated fluoro displacement reactions in the synthesis of cyanophenoxazines and related compounds
Source: Royal Society of Chemistry journal article supplement (doi:10.1039/b008503k), 2001-01-01

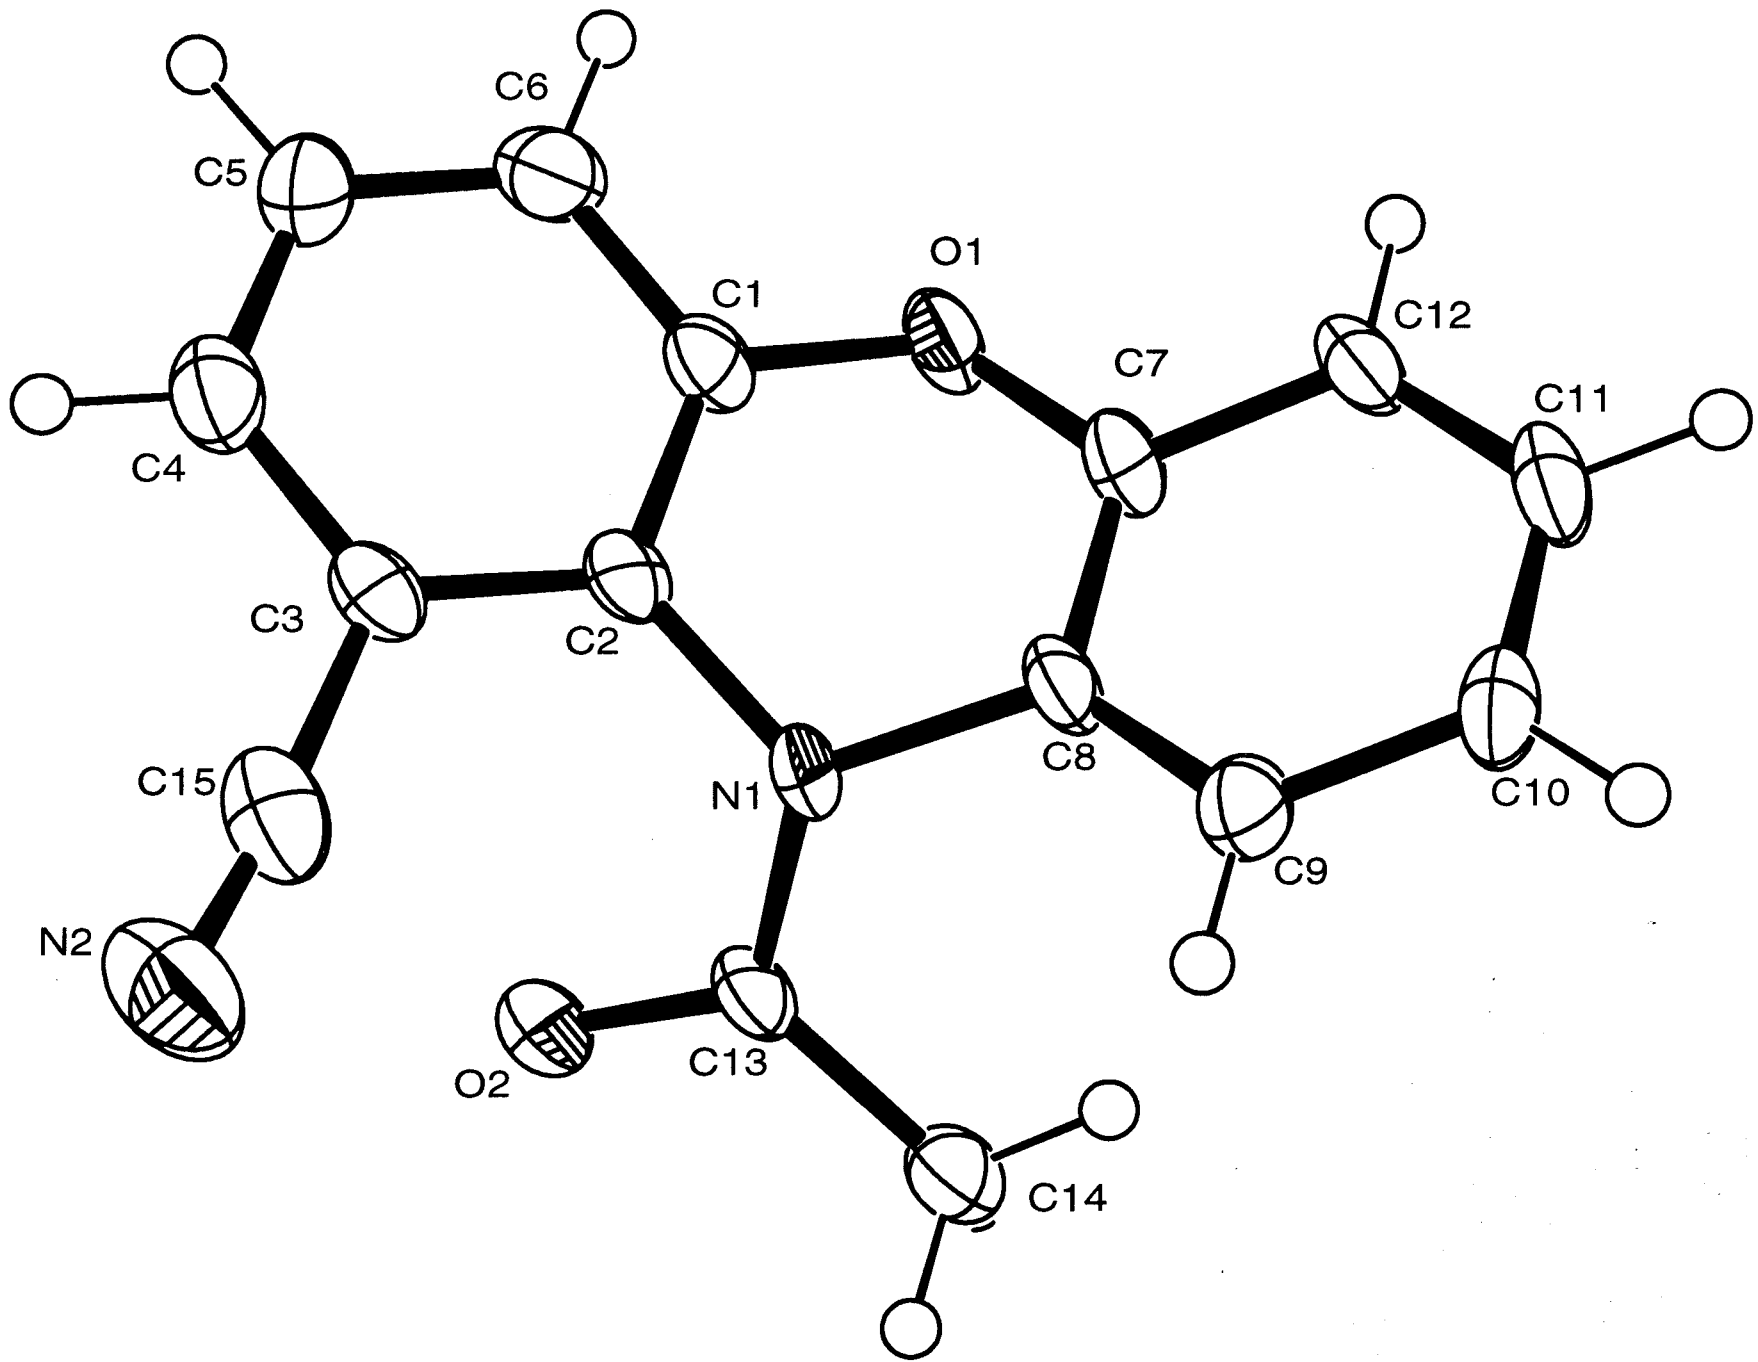

Supplement: b008503k_1.pdf [file b008503k_1.pdf]

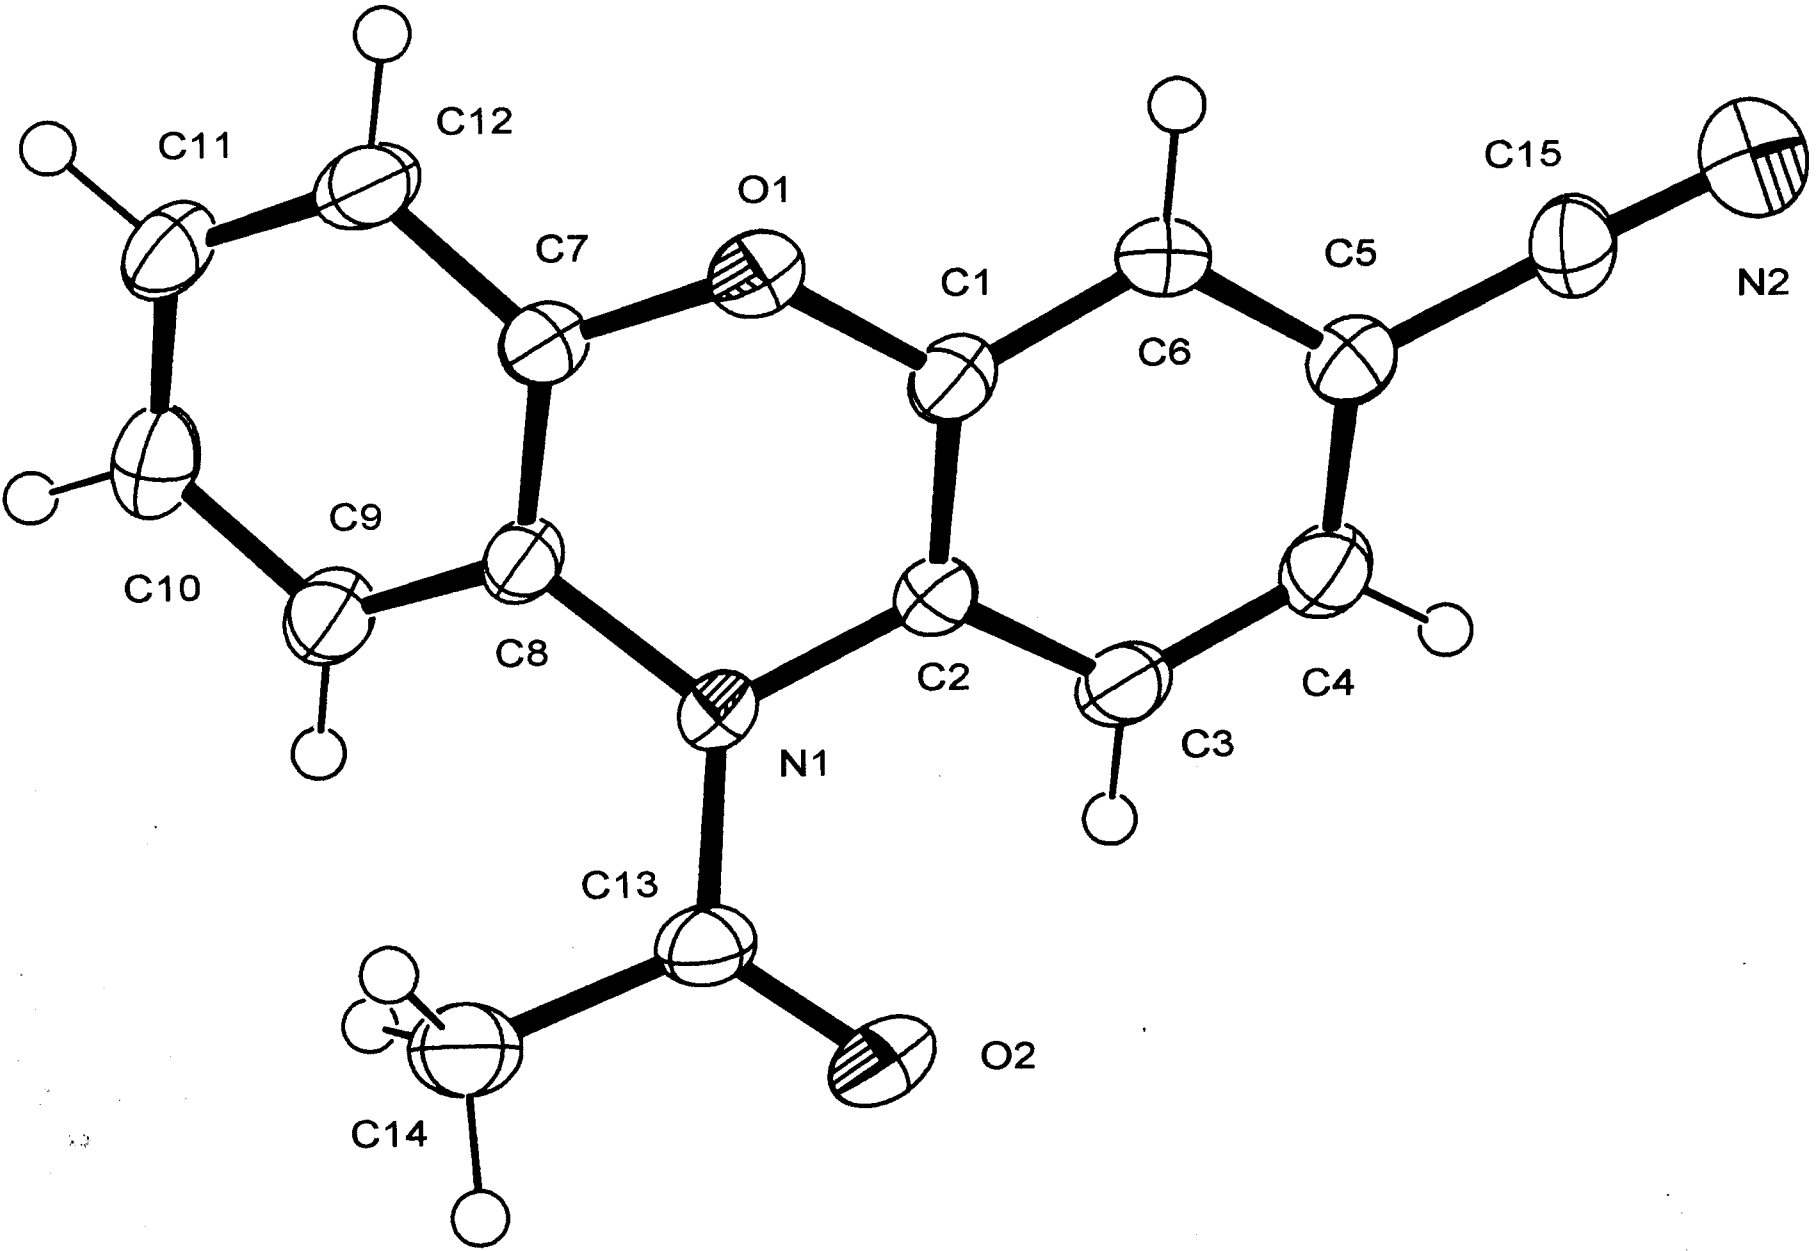

Supplement: b008503k_2.pdf [file b008503k_2.pdf]
